# Supplementary material
Source: publisher figshare collection journal article supplement (https://gsapubs.figshare.com/articles/dataset/_/12534470)
Supplement: Supplementary file 1 [file 1]

## **SUPPLEMENTARY MATERIAL**

### **1. Age compilation and references of the coastal batholith intrusions**

Magmatic activity in the Lima segment is clustered in three intrusive episodes; 105-85 Ma ago, 75-56 Ma ago and 39-35 Ma ago (Wilson, 1975). In the Pisco-Ica region, intrusion has been dated at  $96 \pm 3$  Ma (Beckinsale et al., 1985). Near Pativilca, the intrusion has an age of c. 37 Ma (McCourt, 1981; Pitcher, 1985). Intrusions in the Arequipa region close to the Majes catchment show U-Pb crystallisation ages of 90 Ma (Mukasa, 1986).

### **References supplementary material<sup>1</sup>**

- Beckinsale, R. D., Sanchez-Fernandez, A. W., Brook, M., Cobbing, E. J., Taylor, W. P. and Moore, N. D., 1985. Rb-Sr whole-rock isochron and K-Ar age determination for the Coastal batholith of Peru, Magmatism at a plate edge: The Peruvian Andes: Glasgow, Scotland, Blackie, p. 177-202.
- McCourt, W. J., 1981. The geochemistry and petrography of the Coastal Batholith of Peru, Lima segment. *Journal of the Geological Society*, v. 138(4), p. 407-420.
- Mukasaa, S. B., 1986. Zircon U-Pb ages of super-units in the Coastal batholith, Peru: Implications for magmatic and tectonic processes. *Geological Society of America Bulletin*, v. 97, p. 241-254.
- Pitcher W. S., Atherton, M. P., Cobbing, E. J. and Beckinsale, R. D., 1985. A multiple and composite batholith, Magmatism at a plate edge: The Peruvian Andes: Glasgow, Scotland, Blackie, p. 93-101.

Wilson, P. A., 1975. K-Ar age studies in Peru with special reference to the emplacement of the Coastal batholith (Ph.D. thesis): Liverpool, England, University of Liverpool, p. 299.

## **2. Method and sensitivity**

All grains were imaged by a ZEISS EVO 50 Scanning Electron Microscope at the University of Bern in order to investigate their morphology and collect high-resolution images unravelling the internal microstructures. The first observations on zircon crystals were realized by VPSE (Variable Pressure Secondary Electrons Detector) using 20–10 kV, 100  $\mu$ A beam current,  $\sim$ 10 mm working distance at  $\sim$ 20–10 Pa chamber pressure, to examine the possible presence of inclusions of other minerals that can impact the U-Pb isotopic results. The most suitable locations of the spots for U-Pb analyses were then selected on the grain rims where neither inclusions nor strong chemical zonation were found (Fig. DR1). U/Pb measurements were conducted at the Institute of Geological Sciences in Bern using a GeoLas-Pro 193 nm ArF Excimer laser system combined with a quadrupole mass spectrometer. Ablation was done using an energy density at the sample surface of 2.5 J/cm<sup>2</sup> with a repetition rate of 9 Hz using spot sizes of 24  $\mu$ m. Zircon standard GJ-1 (Jackson et al. 2004) and NIST SRM 612 have been used for quantification of element concentrations. Accuracy and long term reproducibility was monitored using zircon standard Plešovice ( $337.13 \pm 0.37$  Ma; Sláma et al. 2008; Fig. DR2). Data reduction for U/Pb-dating was done using the software Iolite 2.5 (Paton et al. 2010, 2011) using Petrus and Kamber's (2012) Visual age data reduction scheme and the error propagation method built into Iolite (Table 2).

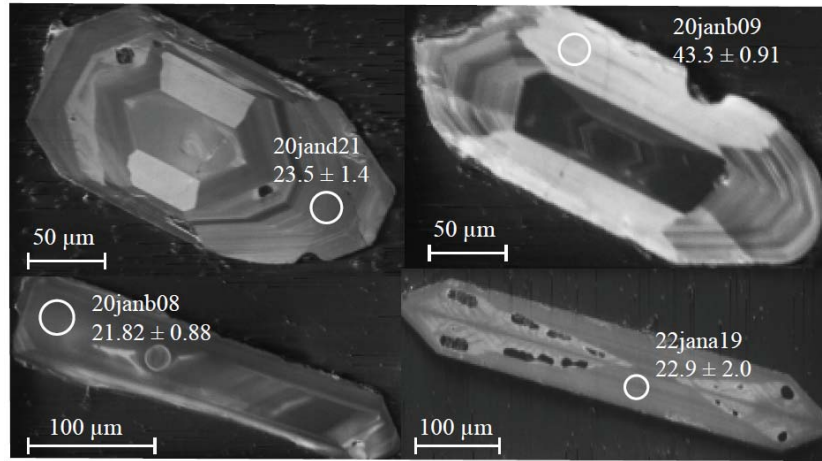

**Figure DR1:** Variable Pressure Secondary Electron (VPSE) images of four dated zircons of sample LIM-ME. The white circles indicate the positions of 24 µm diameter laser ablation pits used for  $^{238}\text{U}$ - $^{206}\text{Pb}$  isotope acquisition. The images show that the crystals dated at 20 Ma are mainly needle shaped zircons.

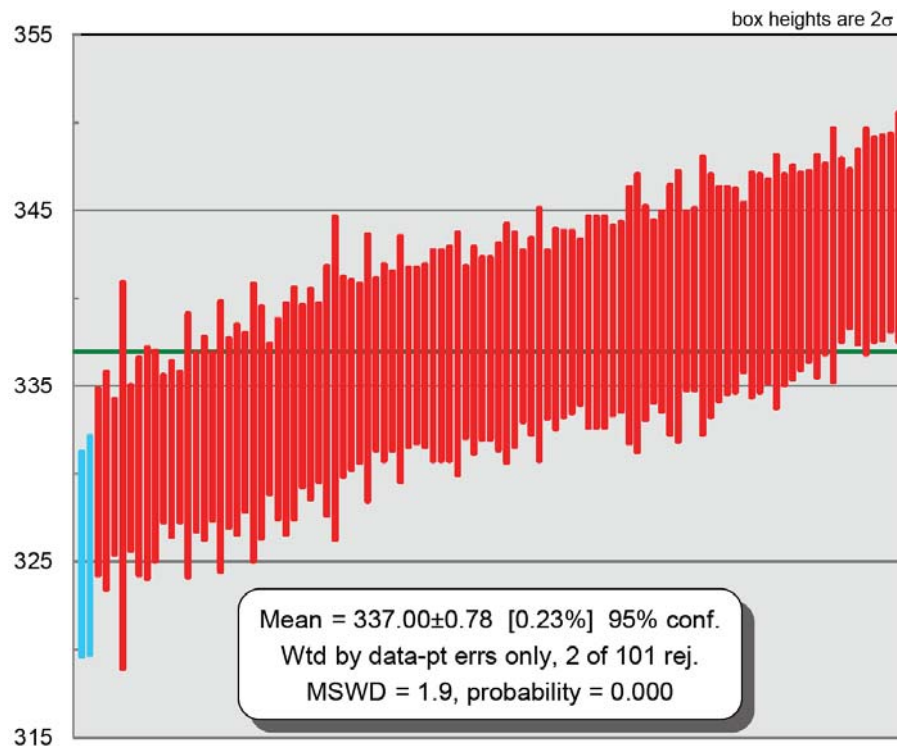

**Figure DR2:** Graph of all the measured concordant Plesovice  $^{206}\text{Pb}/^{238}\text{U}$  ages with  $2\sigma$  error bars during dataacquisition for this study.

One of the main problems in detrital zircon geochronology is to determine the minimum number of grains to ensure that all populations are detected. In addition, the geological information that can be extracted from a set of age data on detrital zircons is critically dependent on the number of analyzed grains (Vermeesch, 2004). Indeed, a distribution with one single age cluster is unlikely to occur in natural sediments. In a more realistic scenario, sediments may contain several age populations, each of which has a non-uniform age distribution. Previous studies of sedimentary provenance that used U–Pb dating of detrital zircons (Morton et al., 1996) have shown that precise and accurate U–Pb ages of 80 to 100 zircon grains in each sample are needed for a reliable identification of the major sedimentary sources (Dodson et al., 1988). However, Andersen (2005) suggested that the random fraction should comprise 35–70 grains or more, depending on the complexity of the pattern at which ages are distributed. We only used grains where the U-Pb ages were concordant.

Andersen (2005) suggested that the relative error in the population size decreases with increasing number of analyses, but that this decrease occurs only slowly for small populations. The same author also showed that the abundance of any zircon population amounting to less than ca. 10% of the analyzed zircons is systematically underestimated in data sets comprising less than ca. 100 analyses.

Another important point is that sediment size strongly influences the provenance results. Looking at the grain scale, Tertiary-aged grains along with those derived from the Coastal batholith are mostly observed in the Lima catchment. However, Le Roux et al. (2000) have shown that the clasts in the Rio Rimac (trunk stream of the Lima catchment) reflect the composition of the Coastal batholith, together with Mesozoic rocks, while clasts derived from the Tertiary rocks are absent. This could indicate that the Tertiary rocks, mainly exposed on the Altiplano, have been less eroded than what the detrital zircon signal would imply. Such variation is highlighted in the probability density diagrams of the coastal samples, which show that 20-Ma zircons are more abundant in the terrace deposits than in modern sediments. This observation would infer that today, the major sediment sources areas are situated in the Coastal batholith that is exposed along the middle reaches of the catchment. In contrast, the ages of detrital zircons

encountered in the terrace deposits at Lima were derived from both the Coastal batholith (middle reaches) and the Tertiary rocks (Altiplano).

## **References supplementary material<sup>2</sup>**

Andersen, T., 2005. Detrital zircons as tracers of sedimentary provenance: limiting conditions from statistics and numerical simulation, *Chemical Geology*, v.216, p. 249– 270.

Dodson, M., Compston, W., Williams, I., and Wilson, J., 1988, A search for ancient detrital zircons in Zimbabwean sediments: *Journal of the Geological Society*, v. 145, p. 977– 983.

Jackson, S. E., Pearson, N. J., Griffin, W. L. and Belousova, E. A., 2004. The application of laser ablation-inductively coupled plasma-mass spectrometry to in situ U–Pb zircon geochronology. *Chemical Geology*, v. 211(1), p. 47-69.

Le Roux, J. P., Correa, C. T., and Alayza, F., 2000. Sedimentology of the Rímac-Chillón alluvial fan at Lima, Peru, as related to Plio-Pleistocene sea-level changes, glacial cycles and tectonics. *Journal of South American Earth Sciences*, v. 13(6), p. 499-510

Morton, A. C., Claoué-Long, J. C., and Berge, C., 1996. SHRIMP constraints on sediment provenance and transport history in the Mesozoic Statfjord Formation, North Sea. *Journal of the Geological Society*, v. 153(6), p. 915-929.

Paton, C., Woodhead, J. D., Hellstrom, J. C., Hergt, J. M., Greig, A. and Maas, R., 2010. Improved laser ablation U-Pb zircon geochronology through robust downhole fractionation correction. *Geochemistry, Geophysics, Geosystems*, v. 11(3).

Paton, C., Hellstrom, J., Paul, B., Woodhead, J. and Hergt, J., 2011. Iolite: Freeware for the visualisation and processing of mass spectrometric data. *Journal of Analytical Atomic Spectrometry*, v. 26(12), p. 2508-2518.

Petrus, J. A. and Kamber, B. S., 2012. VizualAge: A Novel Approach to Laser Ablation ICP-MS U-Pb Geochronology Data Reduction. *Geostandards and Geoanalytical Research*, v. 36(3), p. 247-270.

Sláma, J., Košler, J., Condon, D. J., Crowley, J. L., Gerdes, A., Hanchar, J. M. and Schaltegger, U., 2008. Plešovice zircon—a new natural reference material for U–Pb and Hf isotopic microanalysis. *Chemical Geology*, v. 249(1), p. 1-35.

101 Vermeesch, P., 2004. How many grains are needed for a provenance study? *Earth and Planetary Science*  
102 *Letters*, v. 224(3), p. 441-451.

103

104

Table DR1

| Catchment | Sample name | Latitude (°S) | Longitude (°W) | Altitude (m) | Description    | Age of the terrace | Trunk or tributary | Number of dated grains | Zircon age population (Ma) |
|-----------|-------------|---------------|----------------|--------------|----------------|--------------------|--------------------|------------------------|----------------------------|
| Majes     | PRC-ME702   | 16.0037       | 72.4759        | 700          | Modern sand    |                    | Trunk              | 35                     | 20 - 185                   |
|           | CL-PE3      | 15.8691       | 72.45          | 870          | Terrace matrix | 100 ka             | Trunk              | 22                     | 25 - 120                   |
| Pisco     | PRC-ME16    | 13.7285       | 75.8859        | 401          | Modern sand    |                    | Trunk              | 48                     | 62 - 90                    |
|           | PI-DP       | 13.7285       | 75.8859        | 390          | Terrace matrix | 40 ka              | Trunk              | 50                     | 20 - 62 - 90               |
|           | PISCO2      | 13.5684       | 75.538         | 1247         | Modern sand    |                    | Tributary          | 40                     | 62                         |
|           | PISCO3      | 13.5684       | 75.538         | 1247         | Terrace matrix | 40 ka              | Tributary          | 39                     | 62                         |
| Lima      | LIM-ME2     | 12.02703      | 76.9903        | 229          | Modern sand    |                    | Trunk              | 63                     | 20 - 62                    |
|           | LIM-ME      | 11.9165       | 76.6178        | 1110         | Modern sand    |                    | Tributary          | 58                     | 20                         |
|           | LIM-PE1     | 12.121        | 77.044         | 64           | Terrace matrix | Unknown            | Trunk              | 47                     | 20 - 45 - 62 - 80          |
| Pativilca | PAT-ME      | 10.7174       | 77.7672        | 71           | Modern sand    |                    | Trunk              | 46                     | 35 - 250                   |
|           | PAT-PE      | 10.7081       | 77.248         | 75           | Terrace matrix | 20 ka              | Trunk              | 50                     | 35 - 80 - 250              |

Table DR2
